# Supplementary material
Source: publisher site journal article supplement (https://www.degruyterbrill.com/publication/journal_key/PRBS/downloadAsset/PRBS_Reference%20Style%20Unified%20Style%20Linguistics%20and%20Mouton_Full%20Guide.pdf)
Supplement: Supplementary file 1 [file PRBS_Reference%20Style%20Unified%20Style%20Linguistics%20and%20Mouton_Full%20Guide.pdf]

# REFERENCE STYLE UNIFIED STYLE Linguistics & Mouton

## Full guide

### In-text citation

#### Direct citation

##### **Single author**

Bybee (2010)

##### **Two authors**

Stefanowitsch and Gries (2003)

##### **More than two/three authors**

Balota et al. (2001)

##### **Series of references**

Gernsbacher (1984), Connine et al. (1990), Blasko and Connine (1993), and Juhasz et al. (2015)

##### **Same author group with different years**

Stefanowitsch and Gries (2003, 2005)

##### **Same author group with same year**

Lawrence and David (2009a, 2009b)

##### **Author (with same surname and different initials) with same year**

L. Park (2000) and K. Park (2000)

#### Indirect citation

##### **Single author**

(Bybee 2010)

##### **Two authors**

(Stefanowitsch and Gries 2003)

##### **More than two/three authors**

(Balota et al. 2001)

##### **Series of references**

##### **Alphabetical order**

(Blasko and Connine 1993; Connine et al. 1990; Gernsbacher 1984; Juhasz et al. 2015)

##### **Same author group with different years**

(Stefanowitsch and Gries 2003, 2005)

##### **Same author group with same years**

(Lawrence and David 2009a, 2009b)

##### **Author (with same surname and different initials) with same year**

(K. Park 2000; L. Park 2000)

## Reference type

### Author initials

Abbreviated with a dot and spaced

### Reference list label/order

Alphabetical order

### Journal

Seuren, Pieter A. M. & Dany S. Jaspers. 2014. Logico-cognitive structures in the lexicon. *Language* 90(1). 607–643.

### Journal with supplement/article number

Carlton, L. & Alan S. Prince. 2004. An investigation of the effects of music on thematic apperception test (TAT) interpretations. *Musicae Scientiae* 7(1 Suppl). 9–30.

### et al. usage

not allowed – all the authors are listed

Reid, Nicholas, Michael J. Walsh, Mercedes Q. Hinkson, William McGregor, Mark C. Baker, Jens E. L. Van Gysel, Street, Chester & Lyn Street. 2009. Parent marital quality and the parent-adolescent relationship: Effects on sexual activity among adolescents and youth. *Marriage & Family Review* 45. 270–288.

### Epub ahead of print (DOI)

McCarthy, John J. Jr. 2016. Sensory motor grounding of musical embodiment and the role of prediction: A review. *Frontiers in Psychology*. <https://doi.org/10.3389/fpsyg.2016.00308> (Epub ahead of print).

### Journal – in press/forthcoming

Peterson, David & Immanuel Barshi. Metabolic effects of fructose and the worldwide increase in obesity. *Physiol Rev*, in press.

### Book/monograph

Langacker, Ronald W. 1999. *Grammar and conceptualization*. Berlin & New York: Mouton de Gruyter.

### Book with edition

Verhagen, Arie. 2005. *Constructions of intersubjectivity: Discourse, syntax, and cognition*, 2nd edn. Oxford: Oxford University Press.

### Edited book

Webelhuth, Gert (ed.). 1995. *Government and binding theory and the minimalist program: Principles and parameters in syntactic theory*. Oxford: Blackwell.

### Edited book with chapter title (and editors)

Langacker, Ronald W. 2014. Subordination in a dynamic account of grammar. In Laura Visapää, Jyrki Kalliokoski & Helena Sorva (eds.), *Contexts of subordination. Cognitive, typological and discourse perspectives*, 17–72. Amsterdam & Philadelphia: John Benjamins.

### Book series

Langacker, Ronald W. 2004. Possession, location, and existence. In Augusto Soares da Silva, Amadeu Torres & Miguel Gonçalves (eds.), *Linguagem, cultura e cognição: Estudos de linguística cognitiva*, vol. I, 85–120. Coimbra: Almedina.

### Proceedings/Conferences

Musaka Ronald W. & John J. Akasaka. 2005. Novel network fiber to manage dispersion at 1.55  $\mu\text{m}$  with combination of 1.3  $\mu\text{m}$  zero dispersion single mode fiber. In *Proceedings of the symposium on robotics, mechatronics and animatronics in the creative and entertainment industries and arts*. Hatfield, UK: University of Hertfordshire.

### Electronic publications with DOI

Franks, Steven. 2005. Bulgarian clitics are positioned in the syntax. Available at: [http://www.cogs.indiana.edu/people/homepages/franks/Bg\\_clitics\\_remark\\_dense.pdf](http://www.cogs.indiana.edu/people/homepages/franks/Bg_clitics_remark_dense.pdf).

### Electronic publications without DOI

Mansfield, John. 2014. Polysynthetic sociolinguistics: The language and culture of Murrinh Patha Youth. <https://digitalcollections.anu.edu.au/handle/1885/...> (accessed 3 December 2015).

[For all documents on the web that do not have a DOI, a URL and access date must be provided.]

### Thesis/Dissertation

Iverson, Gregory K. 2008. *Music as discourse: Semiotic adventures in romantic music*. Oxford: Oxford University Press PhD thesis.

Iverson, Gregory K. 2008. *Music as discourse: Semiotic adventures in romantic music*. Oxford: Oxford University Press Dissertation.

### Report

Langacker, Ronald W. 1981. *Medical manpower in Victoria*. East Bentleigh (AU): Monash University. Report No. 4.

### Computer Programs

### Patent

Casali, Roderic F. 2020. *Flexible endoscopic grasping and cutting device and positioning tool assembly*. United States patent 20020103498, 2002.

### Standards

Standards Australia. 1989. *Electrical equipment for coal mines – insulating materials – materials for insulating power conducting components* (AS 1147.1-1989).

### Corporate publication

WHO. 2012. The diagnosis and management of non-alcoholic fatty liver disease: Practice guideline by the American Association for the Study of Liver Diseases, American College of Gastroenterology, and the American Gastroenterological Association. *Hepatology* 55. 2005–2023.
